# Supplementary material
Source: Springer Nature journal article supplement (https://www.springermedizin.de/resource/supplementary/12885_2013_4609_MOESM2_ESM.pdf/9466738)

SUVmax change ratio (%)

Kruskal-Wallis test  $p=0.531$

100  
50  
0  
-50  
-100

38

Lung

40

Bone

37

Lymph node

29

Abdominal organ

23

Muscle Soft tissue

9

Primary

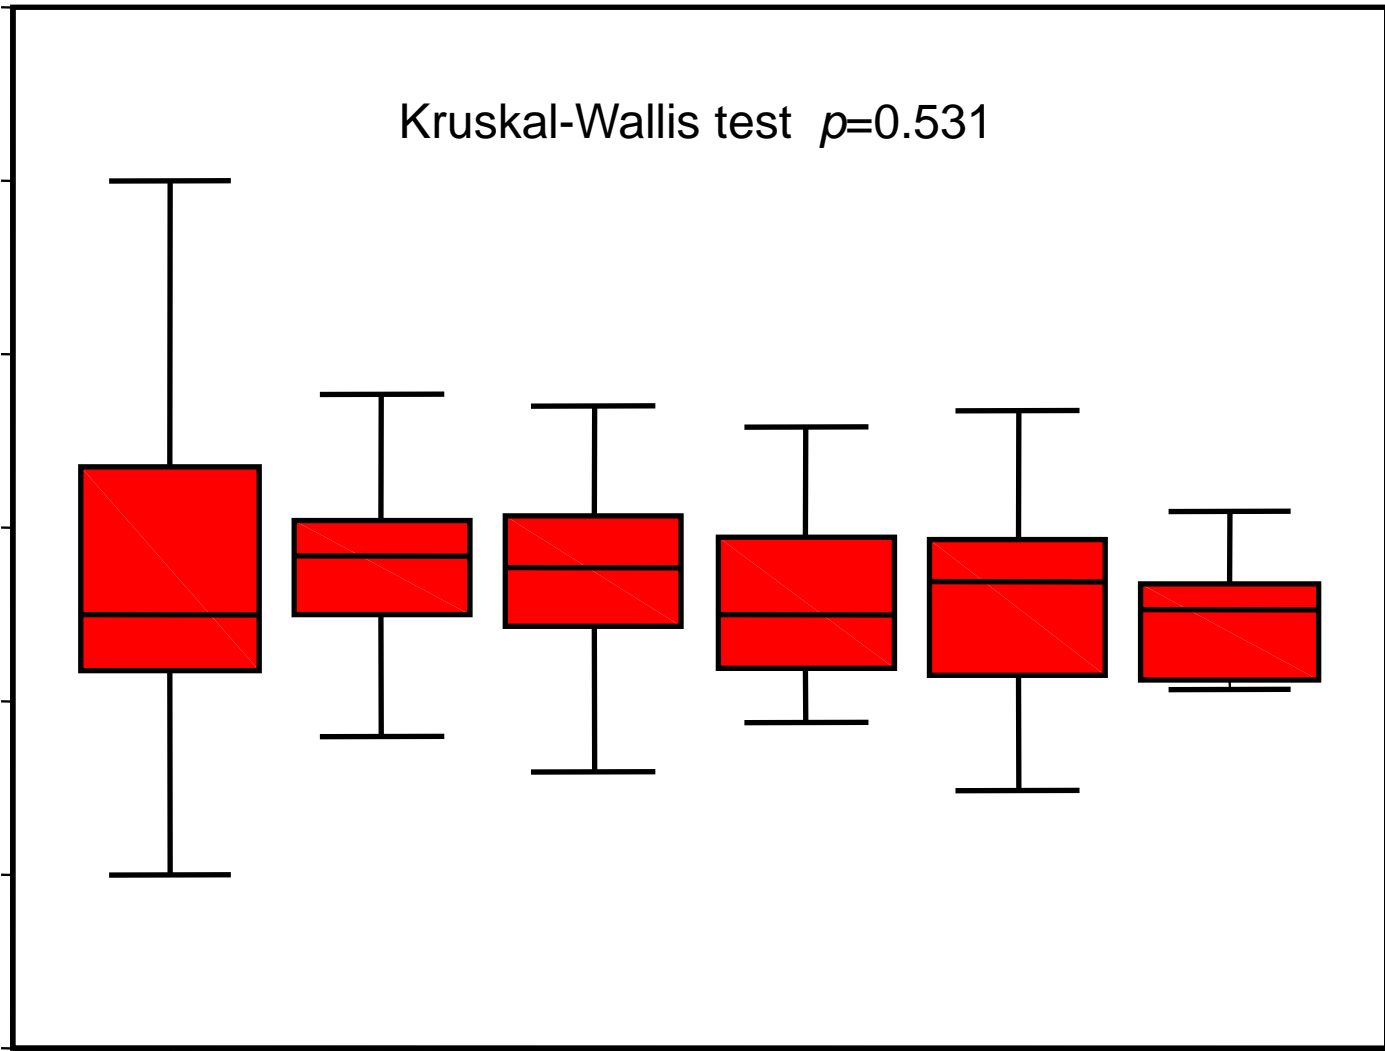

Supplement: MOESM2 [file 9466738]
